# Supplementary material for: Gold nanomakura: nanoarchitectonics and their photothermal response in association with carrageenan hydrogels
Source: publisher site journal article supplement (doi:10.3762/bjnano.15.56), 2024-06-07
Supplement: Additional file 1 [file 2190-4286-15-56-S1.pdf]

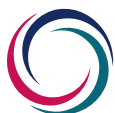

## Supporting Information

for

### **Gold nanomakura: nanoarchitectonics and their photothermal response in association with carrageenan hydrogels**

Nabojit Das, Vikas, Akash Kumar, Sanjeev Soni and Raja Gopal Rayavarapu

*Beilstein J. Nanotechnol.* **2024**, *15*, 678–693. [doi:10.3762/bjnano.15.56](https://doi.org/10.3762/bjnano.15.56)

## Additional figures

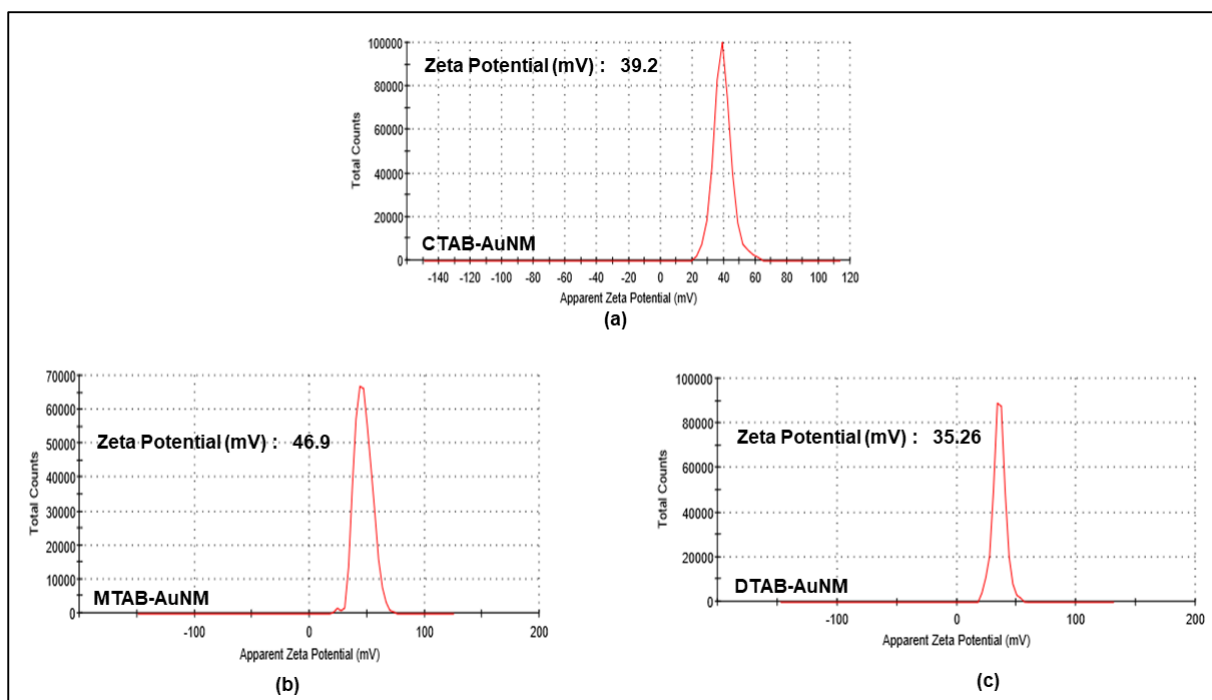

**Figure S1:** Zeta potential value of CTAB-AuNM, MTAB-AuNM, and DTAB-AuNM, respectively.

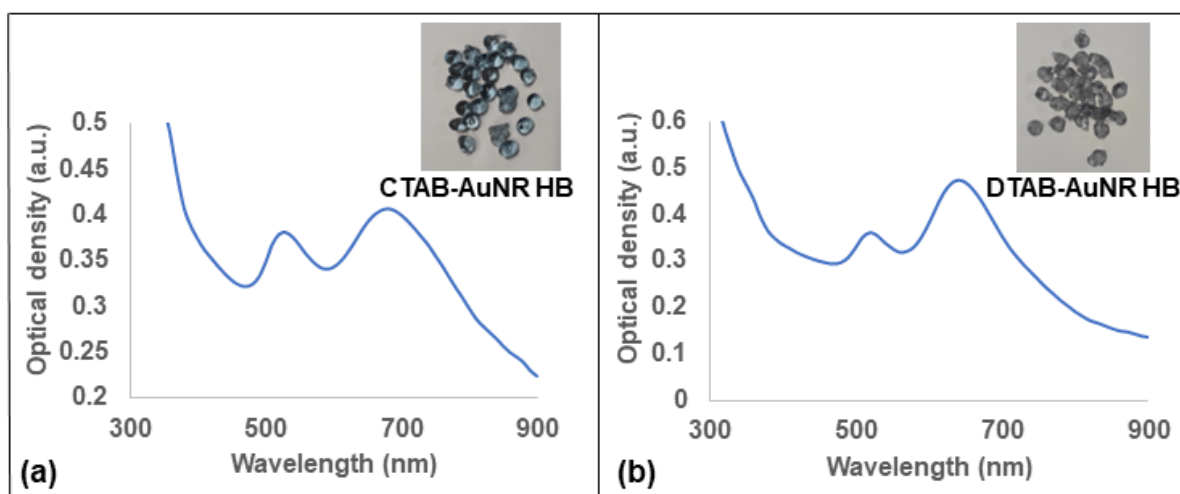

**Figure S2:** Absorption spectra of CTAB-AuNR and DTAB-AuNR after their incorporation in k-CG. The inset images show the hydrogel beads after casting in KCl.

**Photothermal interaction of anisotropic gold nanoparticles in solid state (powder form and hydrogel beads)**

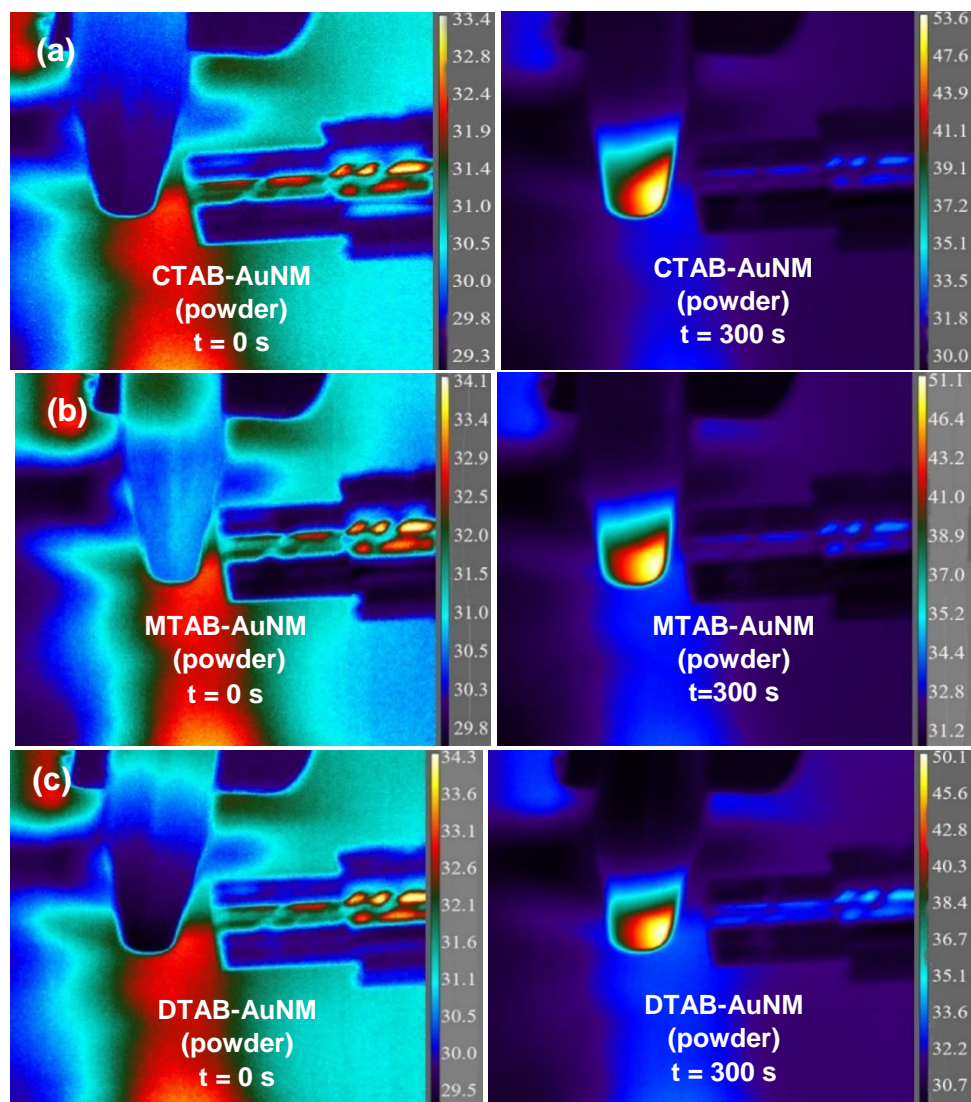

**Figure S3:** Photothermal response of gold nanomakura in powdered form: (a) CTAB-AuNM, (b) MTAB-AuNM, (c) DTAB-AuNM) at time = 0 s (initial), and 300 s (at the end of irradiation).

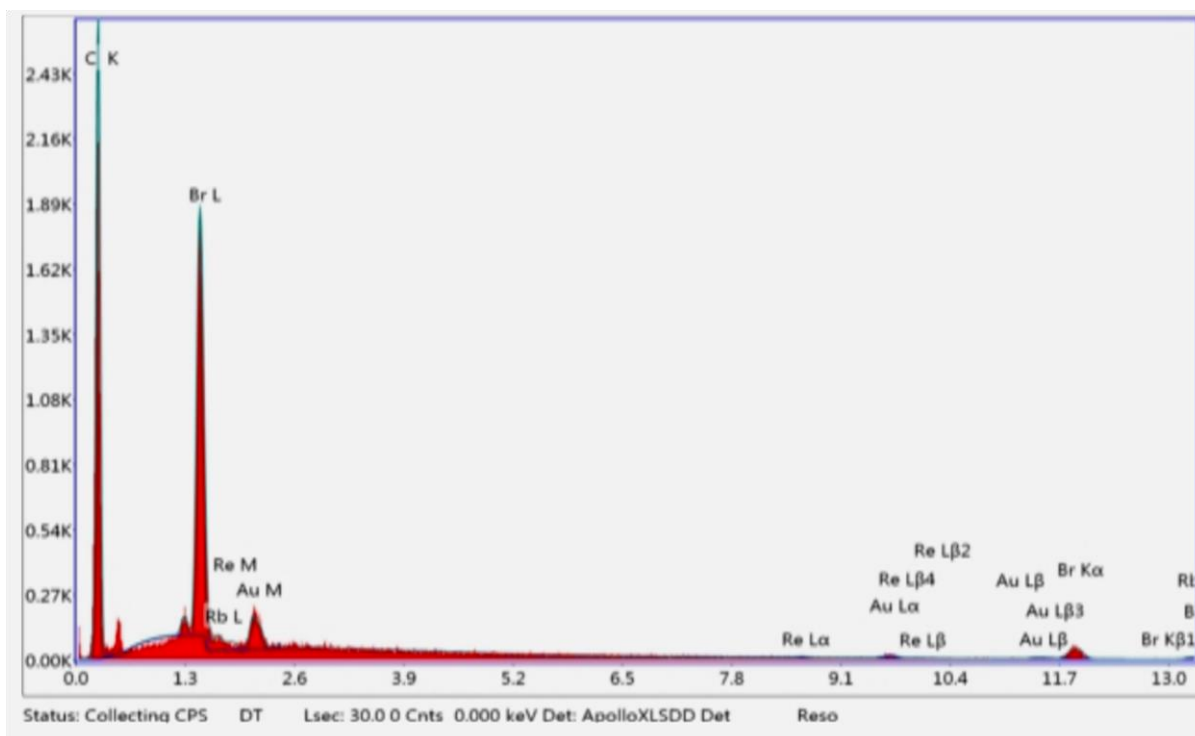

**Figure S4:** A typical SEM EDX spectrum confirming the presence of gold in AuNM.

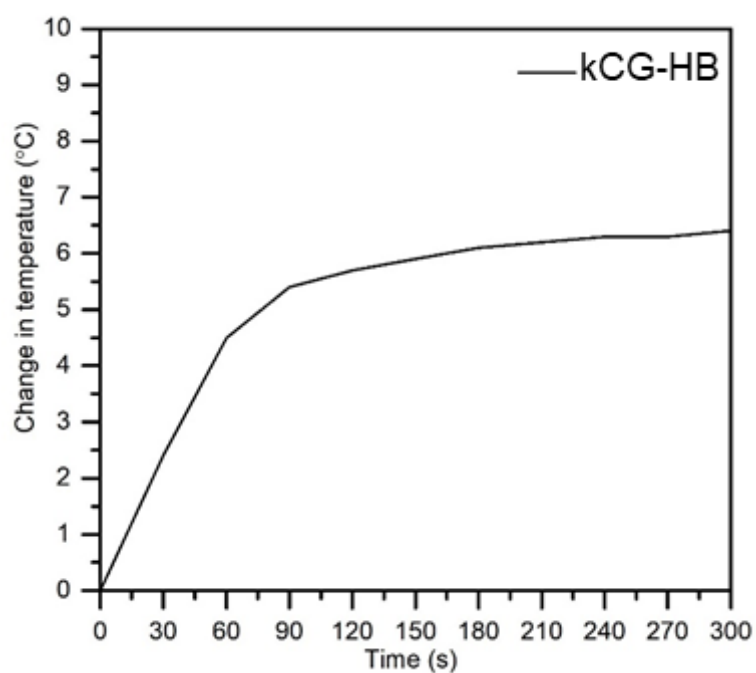

**Figure S5:** Temporal variation in temperature of the hydrogel beads powder without nanoparticles on photothermal interaction with a visible broadband light source.
